# Supplementary material for: Safety of thalidomide and bevacizumab in patients with hereditary hemorrhagic telangiectasia
Source: PubMed Central journal article supplement (PMC6360670; doi:10.1186/s13023-018-0982-4), 2019-02-04
Supplement: 13023_2018_982_MOESM1_ESM.pdf [file 13023_2018_982_MOESM1_ESM.pdf]

## Default Question Block

# HHT SURVEY 2 - February 2017 - Drug Registry - Part 1

This survey is an activity of VASC-ERN , the European Reference Network on Rare Multisystemic Vascular Diseases

*Elisabetta Buscarini, M.D.*

*Deputy Co-Chair of VASC-ERN/HHT*

*<http://vascern.eu/expertise/rare-diseases-wgs/hht-wg/>*

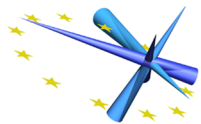

**VASCERN, the European Reference Network  
on Rare Multisystemic Vascular Diseases**

Please, specify your identity.

I am a patient

I am a healthcare professional

I am a scientist

Have you used intravenous Bevacizumab (commercial name: Avastin)?

Yes

No

How did you find it? (Please rate it from 1 to 7, where 1=worst; 4=don't know; 7=best)

1 2 3 4 5 6 7

Have you used thalidomide?

Yes

No

How did you find it? (Please rate it from 1 to 7, where 1=worst; 4=don't know; 7=best)

1 2 3 4 5 6 7

Are you aware of any effects of intravenous Bevacizumab/Avastin in HHT patients?

Are you aware of any effects of thalidomide in HHT patients?

Have you personally prescribed or arranged intravenous Bevacizumab treatment for an HHT patient?

Yes

No

How many people have you prescribed it to?

- <5
- 6-20
- 20-50
- 50-100
- >100

Have any other patients prescribed intravenous Bevacizumab by other doctors reported their experience to you?

- Yes
- No

How many people?

- <5
- 6-20
- 20-50
- 50-100
- >100

Based on your own observations of patients you have seen, how much do you agree with the following statements:

(1=no agreement; 4=don't know; 7=full agreement)

|                                                              | 1                     | 2                     | 3                     | 4                     | 5                     | 6                     | 7                     |
|--------------------------------------------------------------|-----------------------|-----------------------|-----------------------|-----------------------|-----------------------|-----------------------|-----------------------|
| Intravenous Bevacizumab is helpful in treating HHT epistaxis | <input type="radio"/> | <input type="radio"/> | <input type="radio"/> | <input type="radio"/> | <input type="radio"/> | <input type="radio"/> | <input type="radio"/> |

Intravenous Bevacizumab is helpful in treating HHT  
GI bleeding

Intravenous Bevacizumab is helpful in treating HHT  
hepatic VMs

Intravenous Bevacizumab is helpful in reducing  
transfusion dependency

Intravenous Bevacizumab is safe and has no  
significant side effects for people with HHT

Have you personally prescribed or arranged thalidomide treatment for  
an HHT patient?

Yes

No

How many people have you prescribed it to?

<5

6-20

20-50

50-100

>100

Have any other patients prescribed thalidomide by other doctors  
reported their experience to you?

Yes

No

## How many people?

- <5
- 6-20
- 20-50
- 50-100
- >100

Based on your own observations of patients you have seen, how much do you agree with the following statements:

(1=no agreement; 4=don't know; 7=full agreement)

|                                                                             | 1                     | 2                     | 3                     | 4                     | 5                     | 6                     | 7                     |
|-----------------------------------------------------------------------------|-----------------------|-----------------------|-----------------------|-----------------------|-----------------------|-----------------------|-----------------------|
| Thalidomide is helpful in treating HHT epistaxis                            | <input type="radio"/> | <input type="radio"/> | <input type="radio"/> | <input type="radio"/> | <input type="radio"/> | <input type="radio"/> | <input type="radio"/> |
| Thalidomide is helpful in treating HHT GI bleeding                          | <input type="radio"/> | <input type="radio"/> | <input type="radio"/> | <input type="radio"/> | <input type="radio"/> | <input type="radio"/> | <input type="radio"/> |
| Thalidomide is helpful in treating HHT hepatic VMs                          | <input type="radio"/> | <input type="radio"/> | <input type="radio"/> | <input type="radio"/> | <input type="radio"/> | <input type="radio"/> | <input type="radio"/> |
| Thalidomide is helpful in reducing transfusion dependency                   | <input type="radio"/> | <input type="radio"/> | <input type="radio"/> | <input type="radio"/> | <input type="radio"/> | <input type="radio"/> | <input type="radio"/> |
| Thalidomide is safe and has no significant side effects for people with HHT | <input type="radio"/> | <input type="radio"/> | <input type="radio"/> | <input type="radio"/> | <input type="radio"/> | <input type="radio"/> | <input type="radio"/> |

Would you like to be part of the VASCERN\_HHT subcommittee evaluating the use of these agents further?

- Yes
- No

With intravenous Bevacizumab, have you seen any response(s) that you wondered if it/they might be a side effect (adverse event)?

Yes

Maybe

No

With thalidomide, have you seen any response(s) that you wondered if it/they might be a side effect (adverse event)?

Yes

Maybe

No

Powered by Qualtrics
