# Supplementary material for: Safety of thalidomide and bevacizumab in patients with hereditary hemorrhagic telangiectasia
Source: PubMed Central journal article supplement (PMC6360670; doi:10.1186/s13023-018-0982-4), 2019-02-04
Supplement: 13023_2018_982_MOESM2_ESM.pdf [file 13023_2018_982_MOESM2_ESM.pdf]

## Default Question Block

### HHT SURVEY 2 - May 2017 - Drug Registry - Part 2

This survey is an activity of VASCERN , the European Reference Network on Rare Multisystemic Vascular Diseases

Thalidomide and Bevacizumab, have been increasingly used in the latest decade in patients with HHT. Their use in HHT is off-label; this aspect and their potential for adverse events warrant a great level of attention from scientific, clinical and lay HHT community.

This is why we have proposed the **VASCERN HHT SURVEY 2: Drug Registry; in Part 1** either patient or scientist or health care professional have been asked to summarize their experience, if any, with these drugs; their responses to Part 1 allowed to estimate number of patients so far treated and the opinions about these drugs.

**Part 2 addresses health care professionals experience** to capture adverse events occurred in patients treated with bevacizumab and thalidomide.

We ask you to fill the questionnaire by clicking the link below by **May 22, 2017**.

Results of this VASCERN survey will be reported at the International HHT Conference in Dubrovnik.

Thank you for taking the time of sharing your experience!

Elisabetta Buscarini, M.D. (Deputy CoChair, VASCERN-HHT)

Sophie Dupuis Girod, M.D. (CoChair VASCERN-HHT)

Claire L. Shovlin, Ph.D. F.R.C.P. (Chair VASCERN-HHT)

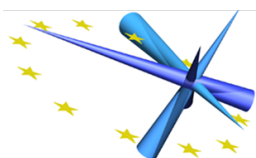

**VASCERN, the European Reference Network  
on Rare Multisystemic Vascular Diseases**

#### HOW TO FILL THE QUESTIONNAIRE:

Please note that every time you leave the questionnaire without submitting, you can go back to the survey and edit it (please use the back button to modify your responses). Once you submit the questionnaire, it will

not be further modifiable.

You can also print the PDF of the questionnaire we sent you in the email to have an hard copy.

Please, specify your identity:

Name

Affiliation

Have you ever treated patients with **Bevacizumab**?

Yes

No

## **BEVACIZUMAB**

Number of patients:

Number of females:

Mutation identified, number: ENG

Mutation identified, number: Alk1

Mutation identified, number: SMAD4

Sum of ages of all patients (e.g: 3 individuals 66, 75 ,67 yo= 208)

## **BEVACIZUMAB**

### **DURATION OF TREATMENT**

how many had only an induction cycle (6 administrations/every 3 weeks)?

how many had induction + maintenance?

sum of drug administrations in all patients having induction + maintenance

## BEVACIZUMAB

### DRUG DOSAGE

5 mg/kg: number of drug administrations

2.5 mg/kg: number of drug administrations

## BEVACIZUMAB

### ADMINISTRATION SCHEDULE

Every ... (number) weeks for induction

Every ... (number) weeks for maintenance

## BEVACIZUMAB

### INDICATION

For otherwise untreatable nose bleedings: number of patients

For otherwise untreatable GI bleedings: number of patients

Combination of both nose and GI bleeding: number of patients

For otherwise untreatable high output cardiopathy: number of patients

Have you ever treated patients with **Thalidomide**?

Yes

No

## THALIDOMIDE

Number of patients:

Number of females:

Mutation identified, number: ENG

Mutation identified, number: Alk1

Mutation identified, number: SMAD4

Sum of ages of all patients (e.g: 3 individuals 66, 75 ,67 yo= 208)

**THALIDOMIDE**

**DURATION OF TREATMENT**

Sum of months of therapy of all patients

## THALIDOMIDE

### DAILY DRUG DOSAGE/patients' number

<50mg/.....

50 mg/.....

100 mg/.....

200 mg/.....

\*mean dosage...../.....

\*for patients treated with different dosages during single treatment calculate average daily dosage

## THALIDOMIDE

### INDICATION

For otherwise untreatable nose bleedings: number of patients

For otherwise untreatable GI bleedings: number of patients

Combination of both nose and GI bleeding: number of patients

For otherwise untreatable high output cardiopathy: number of patients

## **ADVERSE EVENTS**

An Adverse Event (AE) is any unfavorable and unintended sign (including an abnormal laboratory finding), symptom, or disease temporally associated with the use of a medical treatment or procedure that may or may not be considered related to the medical treatment or procedure.

**Report every single AE (only if NOT present before the treatment) by answering to following questions; if you want to report more than one AE you will be re-directed every time to fill this section.**

## **Block 1**

**Patient code** (two first letters of Center name and patient number: example: CR1 for first patient from Crema center; if a patient had more than one AE fill a corresponding number of forms, but with the same assigned patient code)

Patient sex



- Male
- Female

HHT mutation:

- ENG
- Alk1
- SMAD4

Patient age

Drug:

- Bevacizumab
- Thalidomide

Dosage:

Thalidomide.....mg/d

Bevacizumab.....mg/kg

Total of Bevacizumab  
administrations

Is the treatment ongoing?

- Yes
- No

On treatment from (months):

Treatment stopped since (months):

AE Type

- hypertension
- gastrointestinal perforation
- arterial thrombosis
- venous thrombosis/thromboembolic event
- Cardiac failure
- bleeding - if bleeding, specify site:

### Bleeding

- cerebral
- pulmonary
- GI
- Other:.....
- Peripheral neuropathy
- Allergic reaction during bevacizumab infusion
- Joint pain
- Other:.....

AE grade

Table to be made visible by click on: [Table of AE grading](#)

- 1
- 2
- 3

4

5

If death:

certainly related to drug

drug may have contributed

not related to drug

unknown cause

AE Outcome

resolved completely

resolved with sequelae

unresolved/worsened

unknown

Treatment interruption because of AE?

Yes

No

Improvement of AE after treatment interruption?

Yes

No

Treatment restarted?

Yes

No

Recurrence of AE after treatment restart?

Yes

No

Other concomitant drug possibly related to AE?

Yes (which one?)

No

Any alternative cause identifiable for AE?

Yes (which one?)

No

Do you want to insert another AE?

Yes

No and I want to submit my survey (Please note: once submitted the questionnaire will not be further modifiable)
